# Supplementary material for: Catalytic Performance of a New 1D Cu(II) Coordination Polymer {Cu(NO3)(H2O)}(HTae)(4,4′-Bpy) for Knoevenagel Condensation
Source: MDPI journal article supplement (doi:10.3390/molecules21121651), 2016-12-01
Supplement: s1 [file s1]

# Supplementary Materials: Catalytic Performance of a New 1D Cu(II) Coordination Polymer {Cu(NO<sub>3</sub>)(H<sub>2</sub>O)}(HTae)(4,4'-Bpy) for Knoevenagel Condensation

Eduarne S. Larrea, Roberto Fernández de Luis and María I. Arriortua

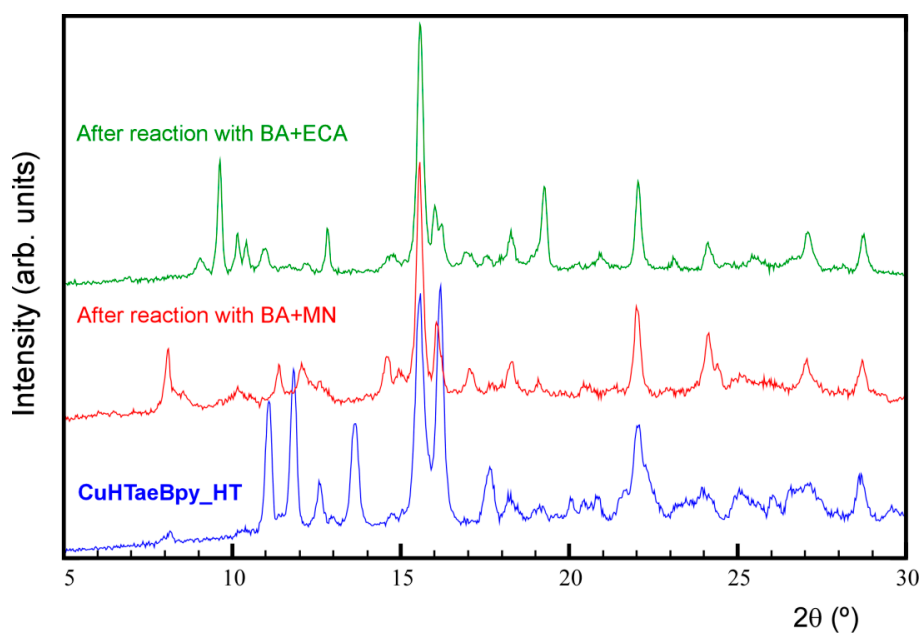

**Figure S1.** X-ray diffractograms of the activated **CuHTaeBpy\_HT** catalyst before the reaction, after reacting with benzaldehyde (BA) and malononitrile (MN), and after reacting with benzaldehyde (BA) and ethyl cyanoacetate (ECA).

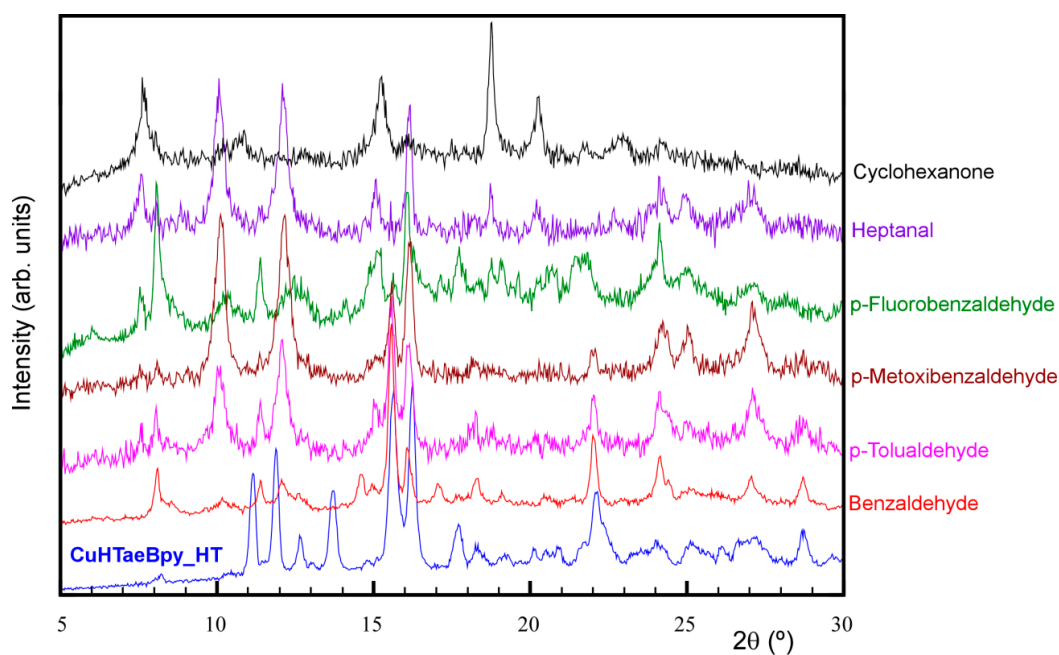

**Figure S2.** X-ray diffraction patterns of the activated catalyst, **CuHTaeBpy\_HT**, and after reacting with various substrates and MN.

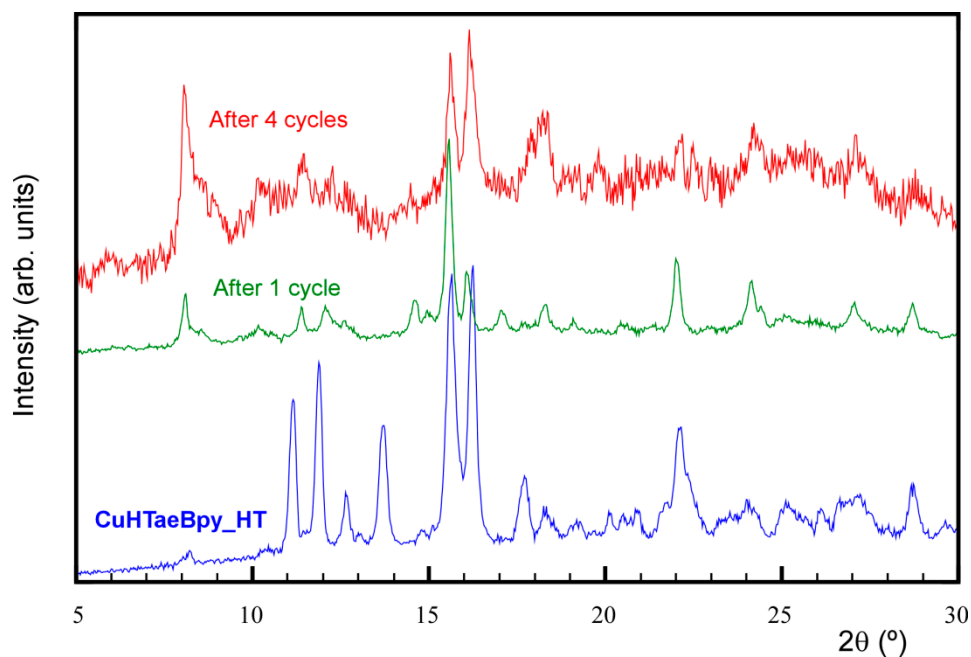

**Figure S3.** X-ray diffraction patterns of the activated catalyst, **CuHTaeBpy\_HT**, and after 1 cycle of reaction and after 4 cycles of reaction of BA and MN.

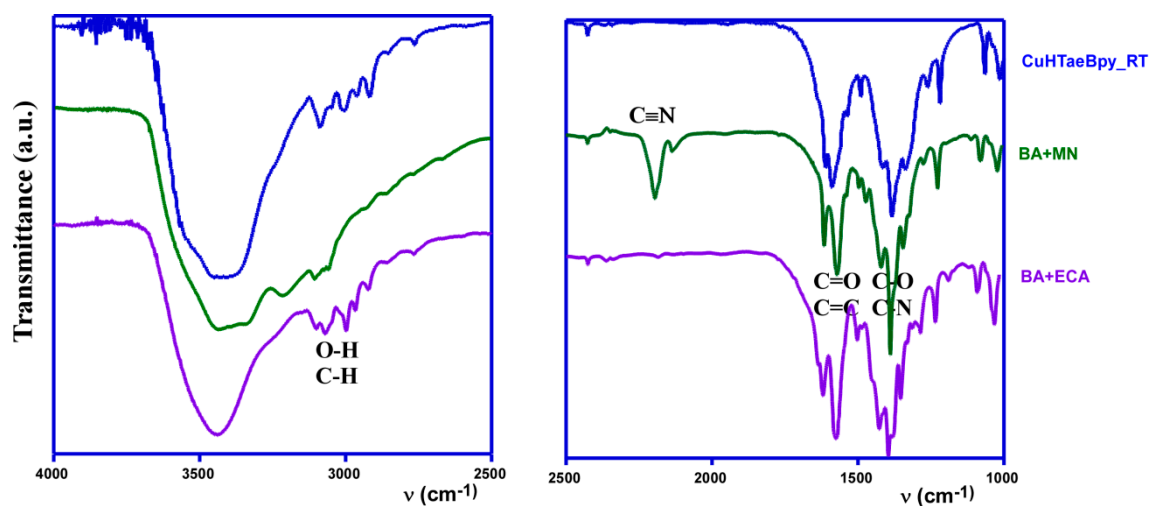

**Figure S4.** IR spectra of the **CuHTaeBpy\_RT** preactivated catalyst, the catalyst after reacting with benzaldehyde (BA) and malononitrile (MN), and after reacting with benzaldehyde (BA) and ethyl cyanoacetate (ECA).

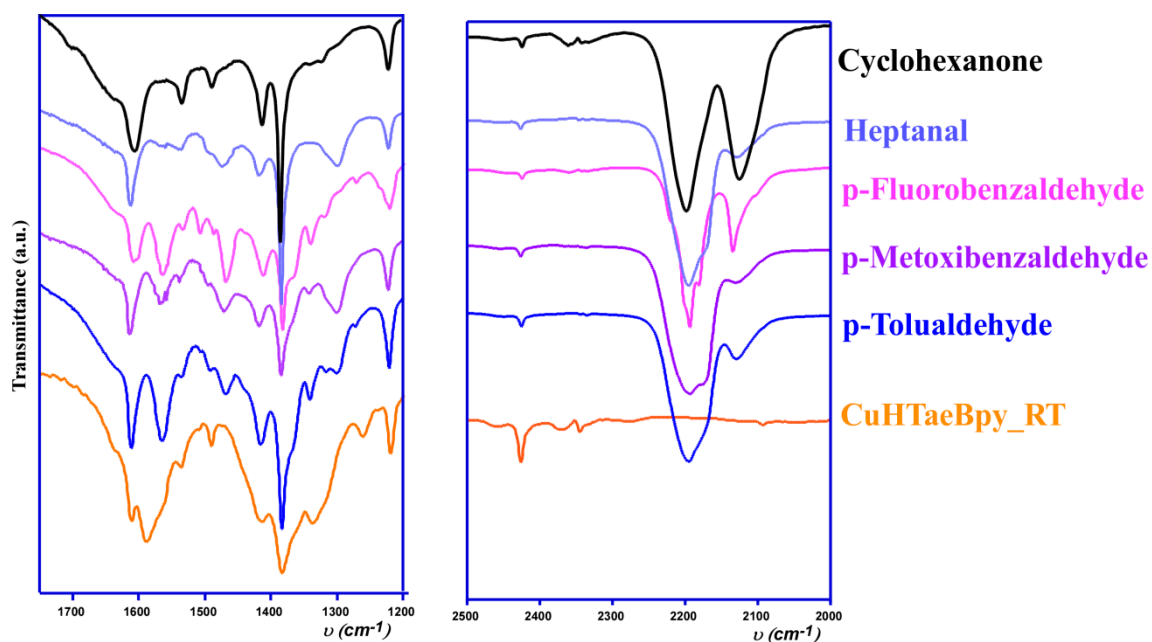

**Figure S5.** IR spectra of the CuHTaeBpy\_RT preactivated catalyst, and the catalyst after reacting with various substrates and malononitrile.

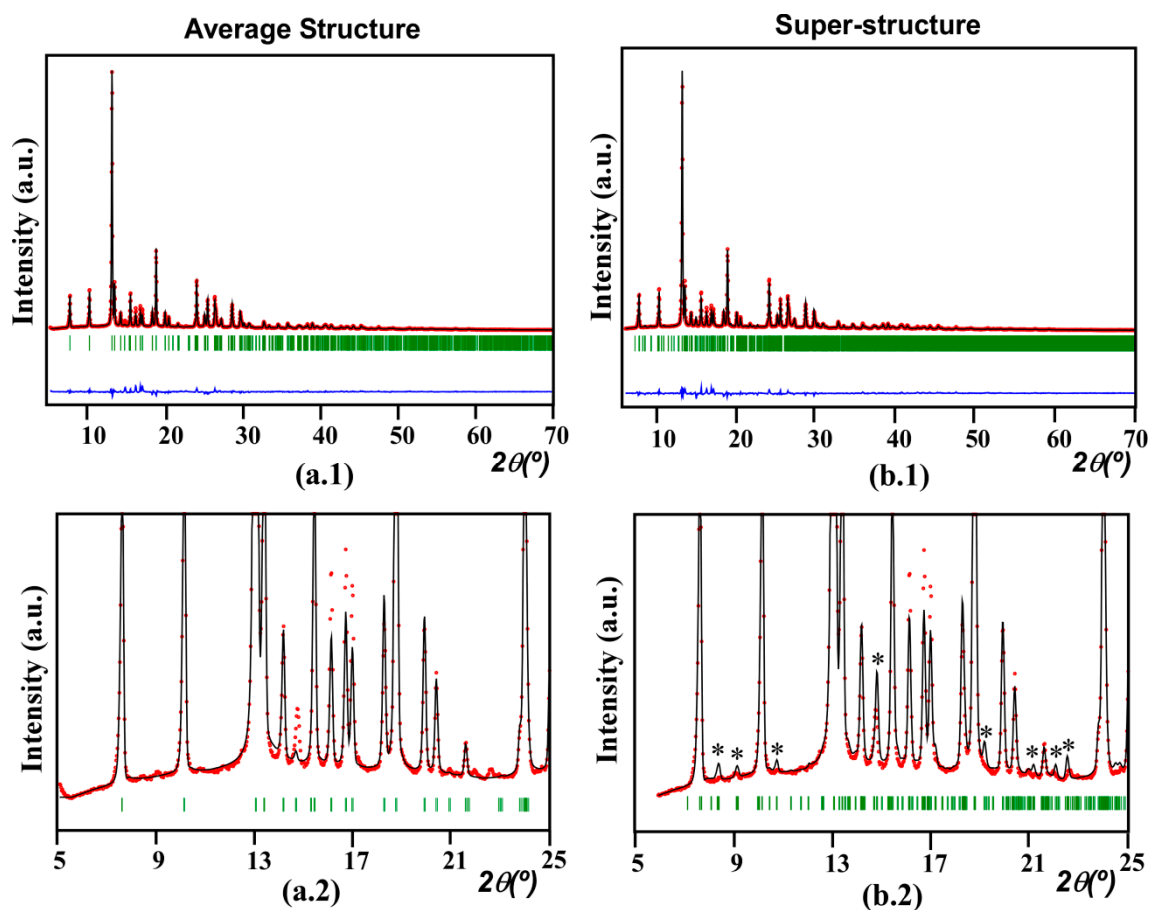

**Figure S6.** Rietveld refinements of the  $[\text{Cu}(\text{NO}_3)(\text{H}_2\text{O})](\text{HTae})(4,4'\text{-Bpy})$  with the average structural model (a.1) and commensurate structural model (b.1). Details of the refinement of the satellite peaks due to the super-structure with the average structural model (a.2) and with the commensurate structural model (b.2).
